# Supplementary material
Source: publisher figshare collection journal article supplement (https://acs.figshare.com/ndownloader/files/4465969)

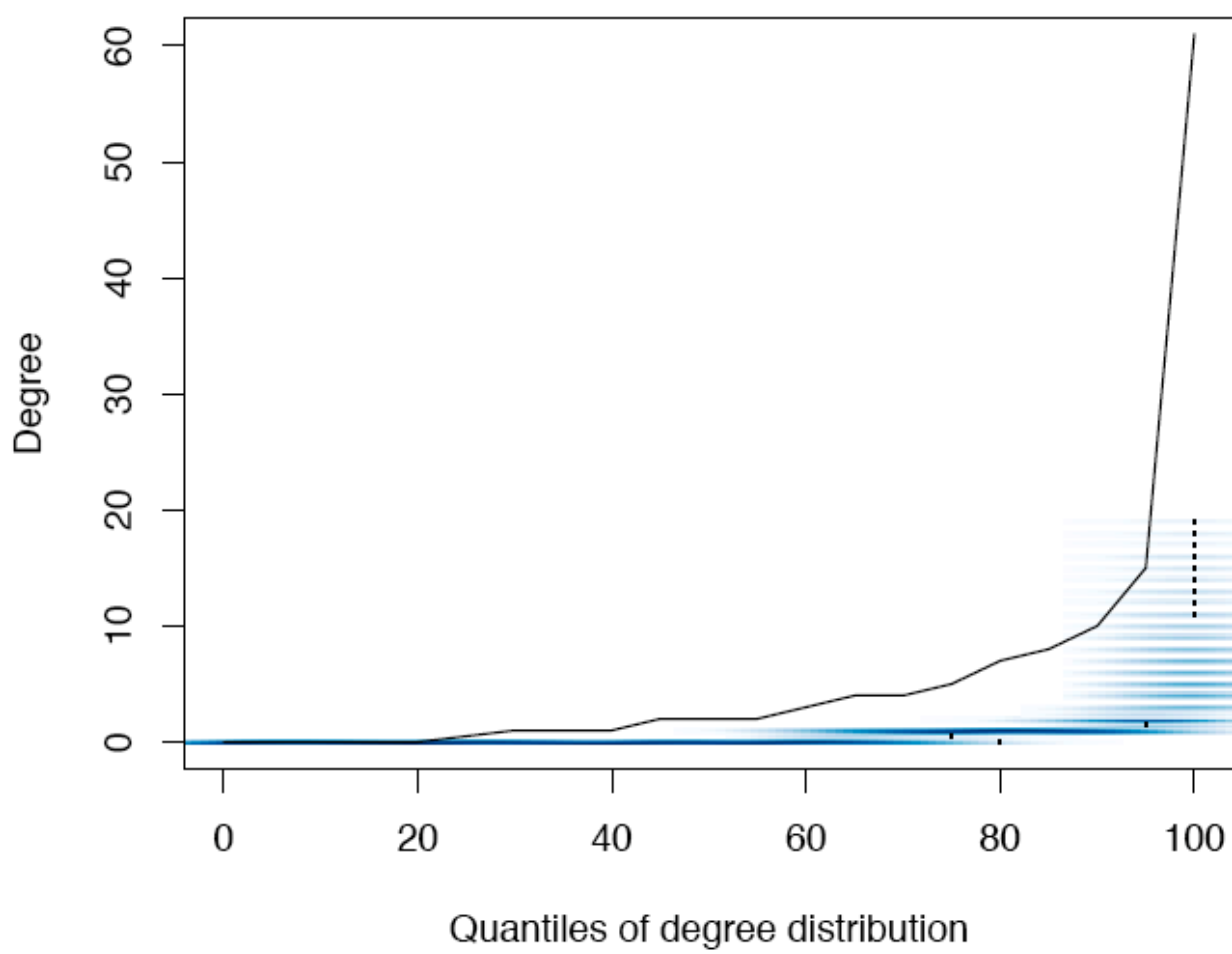

Supplementary Figure 2

Supplement: Supplementary file 1 [file 4465969]
